# Supplementary material
Source: PubMed Central journal article supplement (PMC9511595)

# Supplementary Figure 1

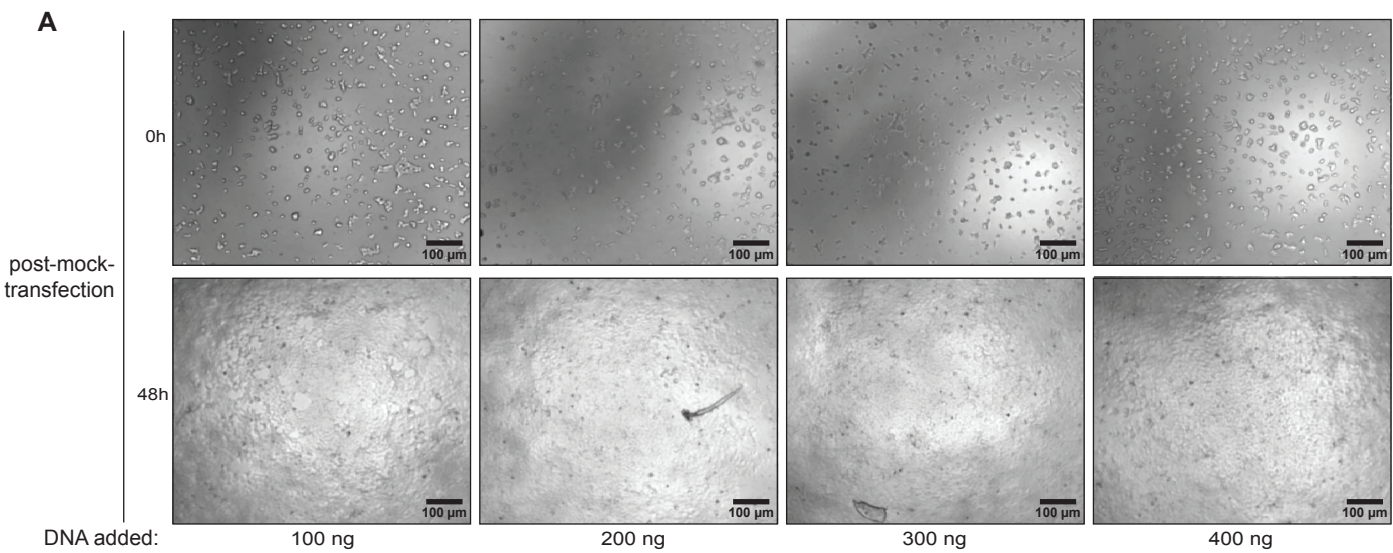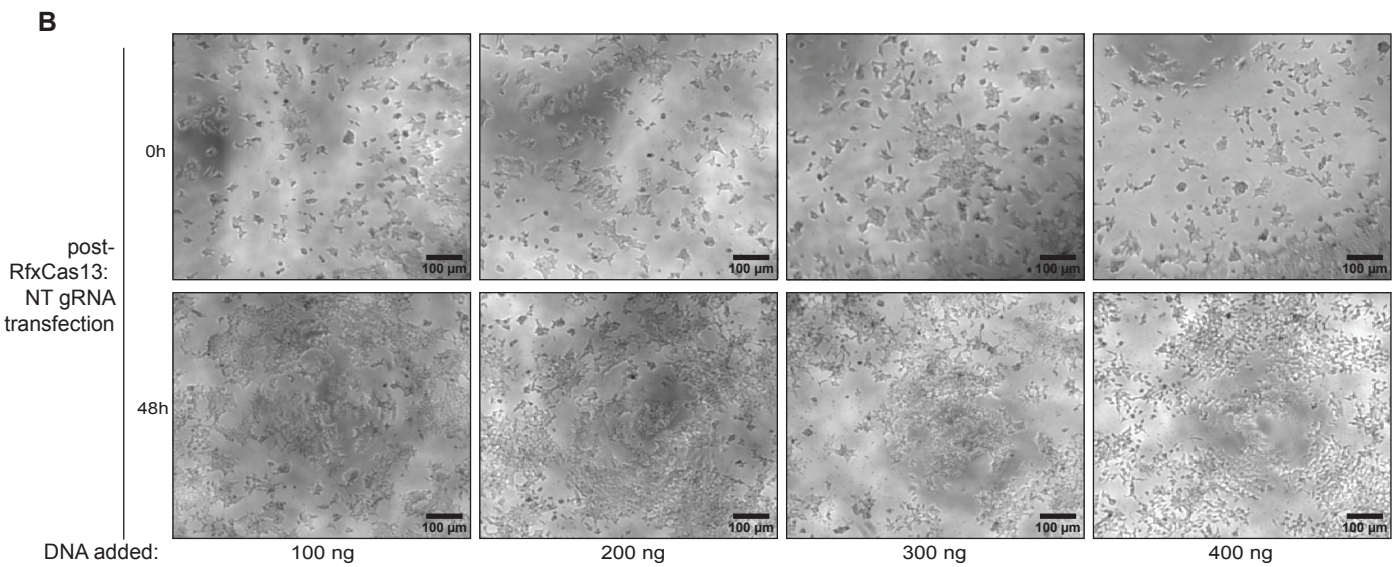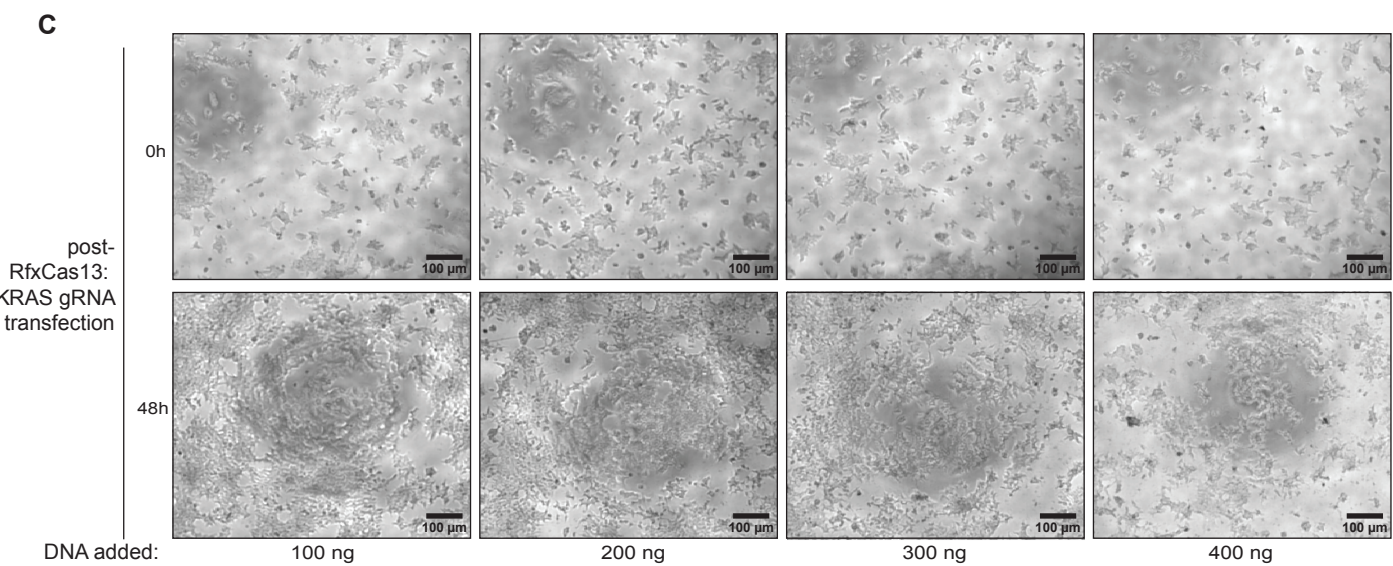

Supplement: NIHMS1836142-supplement-Figure_S1.pdf [file NIHMS1836142-supplement-Figure_S1.pdf]

# Supplementary Figure 2

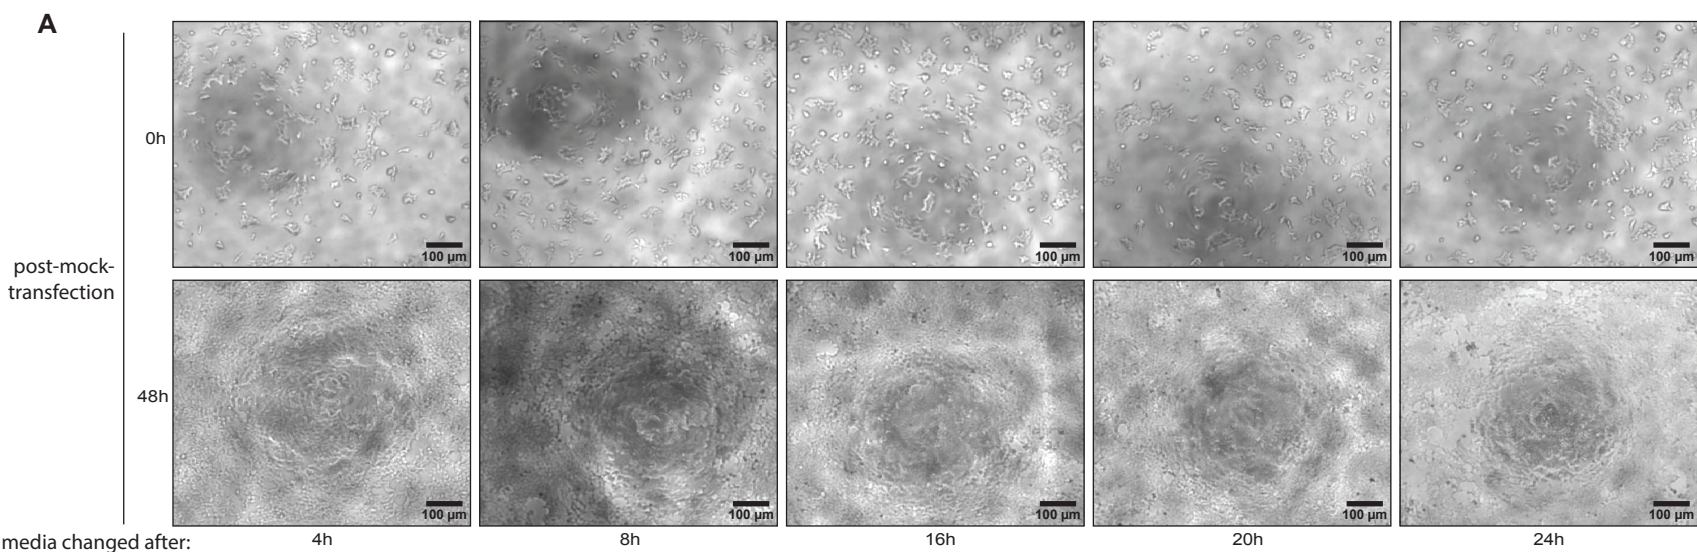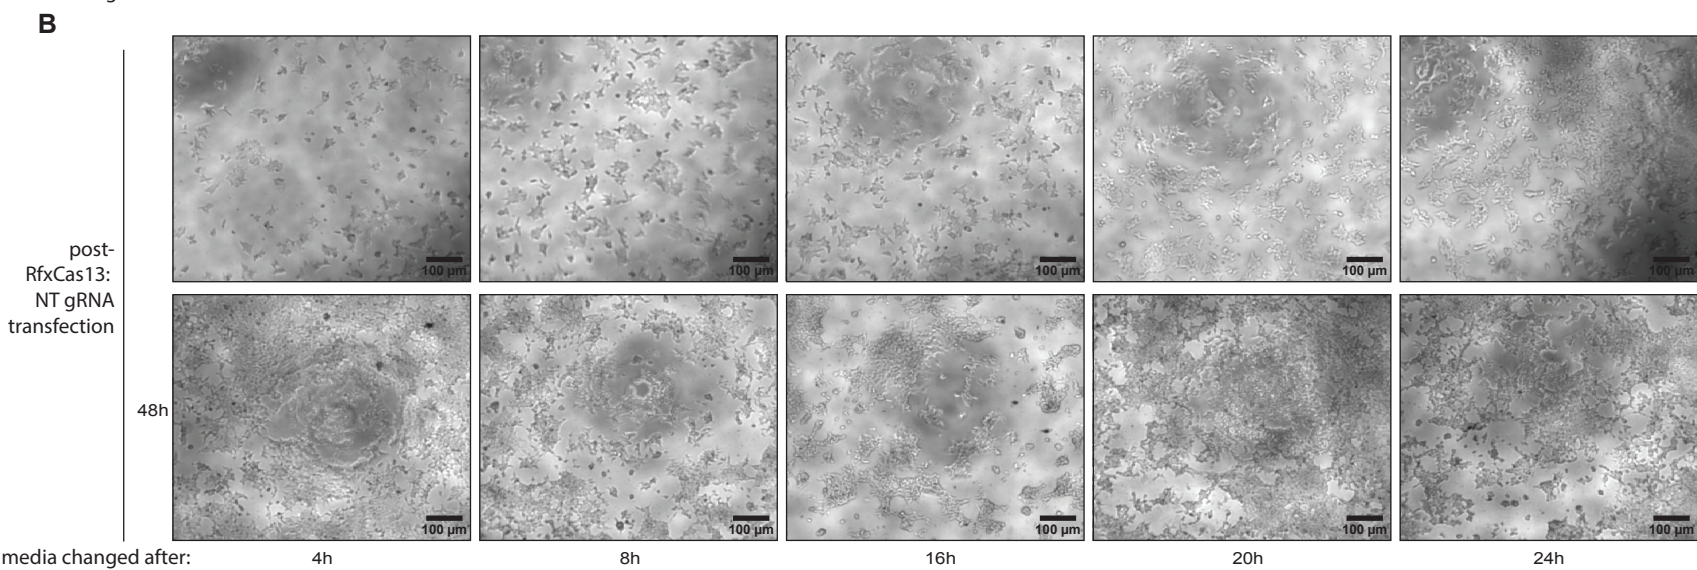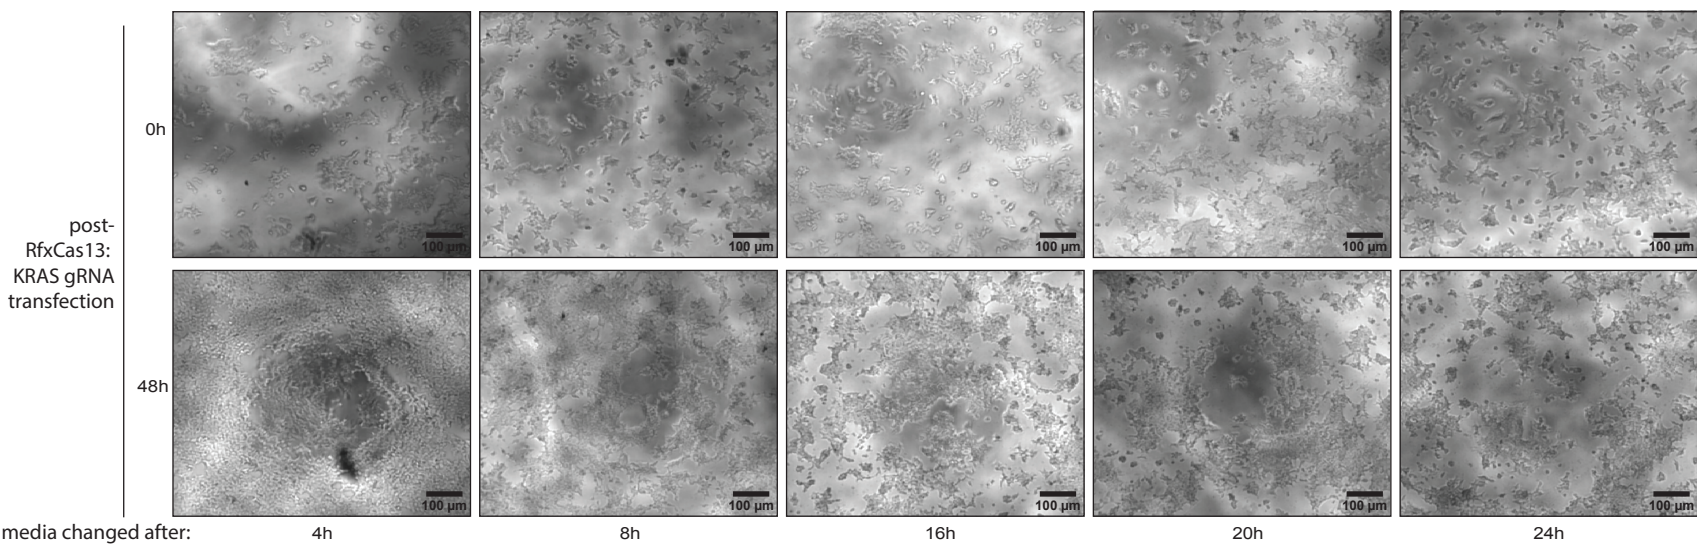

Supplement: NIHMS1836142-supplement-Figure_S2.pdf [file NIHMS1836142-supplement-Figure_S2.pdf]
